# Supplementary material for: Shaping ability of the profile 25/0.06 and protaper F2 in rotary motion, and reciproc in simulated canals
Source: PeerJ. 2018 Dec 14;6:e6109. doi: 10.7717/peerj.6109 (PMC6296330; doi:10.7717/peerj.6109)
Supplement: Data S1 [file peerj-06-6109-s001.xlsx]

## Sheet: Sayfa1
tooth no	İ1(inner1)	i2	i3	apical (i 1+2+3)	i4	i5	i6	middle (i 4+5+6)	i7	i8	i9	i10	coronal(i7+8+9+10)	d1(outer 1)	d2	d3	apical (d 1+2+3)	d4	d5	d6	middle (d 4+5+6)	d7	d8	d9	d10	coronal (d 7+8+9+10)	i1+d1	i2+d2	i3+d3	apical(iç 1+2+3)	i4+d4	i5+d5	i6+d6	middle(id 4+5+6)	i7+d7	i8+d8	i9+d9	i10+d10	coronal(7+8+9+10)	iç toplam (inner total)	dış toplam (outer total	iç+dış toplam (inner+outer total)	time	working lenght	working lenght	fractured instrument	ledge
A1	0.08	0.08	0.07	0.23	0.03	0.12	0.19	0.34	0.19	0.19	0.2	0.24	0.82	0.1	0.11	0.18	0.39	0.22	0.22	0.22	0.66	0.28	0.3	0.28	0.27	1.13	0.18	0.19	0.25	0.62	0.25	0.34	0.41	1	0.47	0.49	0.48	0.51	1.95	1.39	2.18	3.57	55	16	15.69	0	0
A2	0.06	0.11	0.09	0.26	0.05	0.07	0.15	0.27	0.12	0.11	0.09	0.07	0.39	0.14	0.13	0.16	0.43	0.18	0.16	0.14	0.48	0.18	0.22	0.16	0.12	0.68	0.2	0.24	0.25	0.69	0.23	0.23	0.29	0.75	0.3	0.33	0.25	0.19	1.07	0.92	1.57	2.49	52	16	15.93	0	0
A3	0.06	0.09	0.05	0.2	0.07	0.07	0.1	0.24	0.12	0.09	0.08	0.09	0.38	0.07	0.11	0.09	0.27	0.15	0.18	0.19	0.52	0.26	0.27	0.27	0.22	1.02	0.13	0.2	0.14	0.47	0.22	0.25	0.29	0.76	0.38	0.36	0.35	0.31	1.4	0.82	1.81	2.63	55	16	16.24	0	0
A4	0.09	0.1	0.09	0.28	0.12	0.14	0.22	0.48	0.21	0.2	0.17	0.13	0.71	0.09	0.12	0.15	0.36	0.12	0.14	0.18	0.44	0.23	0.26	0.24	0.23	0.96	0.18	0.22	0.24	0.64	0.24	0.28	0.4	0.92	0.44	0.46	0.41	0.36	1.67	1.47	1.76	3.23	47	15.5	15.78	0	1
A5	0.11	0.17	0.18	0.46	0.17	0.24	0.26	0.5	0.24	0.24	0.21	0.15	0.84	0.12	0.09	0.13	0.34	0.19	0.16	0.16	0.51	0.17	0.21	0.23	0.2	0.81	0.23	0.26	0.31	0.8	0.36	0.4	0.42	1.18	0.41	0.45	0.44	0.35	1.65	1.8	1.66	3.46	51	16	15.73	0	0
A6	cancel	cancel	cancel	cancel	cancel	cancel	cancel	cancel	cancel	cancel	cancel	cancel	cancel	cancel	cancel	cancel	cancel	cancel	cancel	cancel	cancel	cancel	cancel	cancel	cancel	cancel	cancel	cancel	cancel	cancel	cancel	cancel	cancel	cancel	cancel	cancel	cancel	cancel	cancel	cancel	cancel	cancel	cancel	cancel	cancel	cancel	0
A7	0.08	0.11	0.12	0.31	0.12	0.15	0.16	0.43	0.13	0.15	0.16	0.14	0.58	0.09	0.13	0.17	0.39	0.21	0.17	0.23	0.51	0.25	0.26	0.26	0.22	0.99	0.17	0.24	0.29	0.7	0.33	0.32	0.39	1.04	0.38	0.41	0.42	0.36	1.57	1.32	1.89	3.21	53	16	15.48	0	0
A8	0.07	0.09	0.09	0.25	0.08	0.13	0.19	0.4	0.16	0.14	0.14	0.11	0.55	0.1	0.1	0.17	0.37	0.17	0.17	0.24	0.58	0.28	0.3	0.31	0.3	1.19	0.17	0.19	0.26	0.62	0.25	0.3	0.43	0.98	0.44	0.44	0.45	0.41	1.74	1.2	2.14	3.34	56	16	15.54	0	0
A9	0.07	0.08	0.09	0.24	0.1	0.08	0.13	0.31	0.11	0.12	0.14	0.11	0.48	0.05	0.05	0.11	0.21	0.14	0.17	0.2	0.51	0.27	0.28	0.27	0.25	1.07	0.12	0.13	0.2	0.45	0.24	0.25	0.33	0.82	0.38	0.4	0.41	0.36	1.55	1.03	1.79	2.82	55	16	15.47	0	0
A10	0.07	0.11	0.1	0.28	0.09	0.1	0.09	0.28	0.13	0.13	0.08	0.07	0.41	0.09	0.12	0.15	0.36	0.18	0.24	0.26	0.68	0.22	0.23	0.23	0.16	0.84	0.16	0.23	0.25	0.64	0.27	0.34	0.35	0.96	0.35	0.36	0.31	0.23	1.25	0.97	1.88	2.85	52	16	15.73	0	0
D1	0.08	0.1	0.09	0.24	0.09	0.12	0.14	0.35	0.14	0.15	0.16	0.11	0.56	0.08	0.13	0.15	0.36	0.17	0.25	0.27	0.69	0.23	0.27	0.25	0.24	0.99	0.16	0.23	0.24	0.63	0.26	0.37	0.41	1.04	0.37	0.42	0.41	0.35	1.55	1.15	2.04	3.19	49	16	15.57	0	0
D2	0.09	0.13	0.09	0.31	0.11	0.08	0.17	0.36	0.15	0.19	0.19	0.12	0.65	0.08	0.1	0.14	0.32	0.17	0.19	0.21	0.57	0.24	0.25	0.28	0.26	1.03	0.17	0.23	0.23	0.63	0.28	0.27	0.38	0.93	0.39	0.44	0.47	0.38	1.68	1.32	1.92	3.24	51	16	15.71	0	0
D3	0.07	0.12	0.09	0.28	0.09	0.14	0.16	0.39	0.18	0.15	0.16	0.13	0.62	0.07	0.11	0.15	0.33	0.21	0.2	0.18	0.59	0.24	0.26	0.21	0.27	0.98	0.14	0.23	0.24	0.61	0.3	0.34	0.34	0.98	0.42	0.41	0.37	0.4	1.6	1.29	1.9	3.19	53	16	15.68	0	0
D4	0.12	0.14	0.08	0.34	0.04	0.09	0.17	0.3	0.17	0.16	0.19	0.16	0.68	0.06	0.16	0.11	0.33	0.18	0.15	0.24	0.57	0.21	0.24	0.28	0.2	0.93	0.18	0.3	0.19	0.67	0.22	0.24	0.41	0.87	0.38	0.4	0.47	0.36	1.61	1.32	1.83	3.15	62	16	15.52	0	0
D5	0.11	0.11	0.09	0.31	0.09	0.13	0.15	0.37	0.18	0.14	0.15	0.21	0.68	0.15	0.14	0.17	0.46	0.18	0.22	0.21	0.61	0.26	0.27	0.3	0.28	1.11	0.26	0.25	0.26	0.77	0.27	0.35	0.36	0.98	0.44	0.41	0.45	0.49	1.79	1.36	2.18	3.54	49	16	15.73	0	0
tooth no	İ1	i2	i3	i 1+2+3	i4	i5	i6	i 4+5+6	i7	i8	i9	i10	i 7+8+9+10	d1	d2	d3	d 1+2+3	d4	d5	d6	middle (d 4+5+6)	d7	d8	d9	d10	coronal (d 7+8+9+10)	i1+d1	i2+d2	i3+d3	apical(i 1+2+3)	i4+d4	i5+d5	i6+d6	middle(id 4+5+6)	i7+d7	i8+d8	i9+d9	i10+d10	coronal(7+8+9+10)	iç toplam	dış toplam	iç+dış toplam	süre	çalışma boyu	kanal boyu	kırık alet	basamak
B1	0.1	0.15	0.17	0.42	0.25	0.33	0.33	0.91	0.28	0.2	0.18	0.16	0.82	0.13	0.13	0.13	0.39	0.12	0.12	0.16	0.4	0.21	0.25	0.24	0.23	0.93	0.23	0.28	0.3	0.81	0.37	0.45	0.49	1.31	0.49	0.45	0.42	0.39	1.75	2.15	1.72	3.87	30	16	15.65	0	0
B2	0.12	0.16	0.14	0.42	0.26	0.37	0.31	0.94	0.24	0.2	0.18	0.13	0.75	0.13	0.17	0.16	0.46	0.18	0.14	0.18	0.5	0.24	0.3	0.29	0.34	1.17	0.25	0.33	0.3	0.88	0.44	0.51	0.49	1.44	0.48	0.5	0.47	0.47	1.92	2.11	1.3	3.41	25	16	15.85	0	0
B3	0.09	0.12	0.15	0.36	0.23	0.32	0.29	0.84	0.24	0.21	0.17	0.17	0.79	0.14	0.19	0.16	0.49	0.15	0.1	0.15	0.4	0.23	0.27	0.27	0.24	1.01	0.23	0.31	0.31	0.85	0.38	0.42	0.44	1.24	0.47	0.48	0.44	0.41	1.8	1.99	1.9	3.89	17	16	15.79	0	0
B4	0.09	0.11	0.14	0.34	0.22	0.11	0.14	0.47	0.26	0.2	0.13	0.11	0.7	0.11	0.2	0.17	0.48	0.17	0.3	0.34	0.81	0.19	0.27	0.29	0.3	1.05	0.2	0.31	0.31	0.82	0.39	0.41	0.48	1.28	0.45	0.47	0.42	0.41	1.75	1.51	2.34	3.85	27	16	15.76	0	0
B5	0.11	0.13	0.18	0.42	0.27	0.32	0.29	0.88	0.23	0.19	0.16	0.13	0.71	0.14	0.16	0.14	0.44	0.14	0.1	0.12	0.36	0.22	0.25	0.29	0.29	1.06	0.25	0.29	0.32	0.86	0.41	0.42	0.41	1.24	0.45	0.44	0.45	0.42	1.76	2.01	1.86	3.87	23	15.5	15.65	0	1
B6	0.07	0.11	0.15	0.33	0.26	0.35	0.33	0.94	0.25	0.22	0.19	0.19	0.85	0.17	0.19	0.18	0.54	0.13	0.08	0.12	0.33	0.2	0.24	0.24	0.19	0.87	0.24	0.3	0.33	0.87	0.39	0.43	0.45	1.27	0.45	0.46	0.43	0.38	1.72	2.12	1.74	3.86	18	16	15.46	0	0
B7	0.07	0.11	0.17	0.35	0.23	0.35	0.37	0.95	0.3	0.22	0.22	0.18	0.92	0.17	0.19	0.16	0.52	0.13	0.09	0.14	0.36	0.24	0.26	0.29	0.27	1.06	0.24	0.3	0.33	0.87	0.36	0.44	0.51	1.31	0.54	0.48	0.51	0.45	1.98	2.22	1.94	4.16	21	16	15.71	0	0
B8	0.09	0.13	0.15	0.37	0.26	0.31	0.32	0.89	0.23	0.23	0.19	0.13	0.78	0.2	0.19	0.2	0.59	0.18	0.15	0.19	0.52	0.26	0.28	0.28	0.28	1.1	0.29	0.32	0.35	0.96	0.44	0.46	0.51	1.41	0.49	0.51	0.47	0.41	1.88	2.04	2.21	4.25	31	16	15.71	0	0
B9	0.09	0.11	0.14	0.34	0.24	0.34	0.33	0.91	0.26	0.23	0.19	0.15	0.83	0.14	0.17	0.17	0.48	0.14	0.09	0.15	0.38	0.2	0.25	0.27	0.27	0.99	0.23	0.28	0.31	0.82	0.38	0.43	0.48	1.29	0.46	0.48	0.46	0.42	1.82	2.08	1.85	3.93	18	16	15.87	0	0
B10	0.08	0.11	0.16	0.35	0.26	0.34	0.3	0.9	0.22	0.19	0.16	0.09	0.63	0.16	0.22	0.17	0.55	0.14	0.11	0.19	0.44	0.27	0.3	0.29	0.28	1.14	0.24	0.33	0.33	0.9	0.4	0.45	0.49	1.34	0.49	0.49	0.45	0.37	1.8	1.88	2.13	4.01	19	16	15.24	0	0
D6	0.09	0.13	0.16	0.38	0.24	0.3	0.31	0.85	0.25	0.24	0.17	0.1	0.76	0.15	0.18	0.15	0.48	0.15	0.14	0.16	0.45	0.26	0.27	0.29	0.27	0.99	0.24	0.31	0.31	0.86	0.39	0.44	0.47	1.3	0.51	0.51	0.46	0.37	1.85	1.99	1.92	3.91	23	16	15.52	0	0
D7	0.1	0.14	0.15	0.39	0.23	0.34	0.32	0.89	0.28	0.25	0.16	0.2	0.89	0.11	0.23	0.18	0.52	0.15	0.13	0.17	0.45	0.25	0.28	0.27	0.26	1.06	0.21	0.37	0.33	0.91	0.38	0.47	0.49	1.34	0.53	0.53	0.43	0.46	1.95	2.17	2.03	4.2	25	16	15.64	0	0
D8	0.11	0.11	0.17	0.39	0.24	0.31	0.32	0.87	0.26	0.23	0.21	0.18	0.88	0.14	0.15	0.19	0.48	0.13	0.14	0.14	0.41	0.24	0.29	0.25	0.28	1.06	0.25	0.26	0.36	0.87	0.37	0.45	0.46	1.28	0.5	0.52	0.46	0.46	1.94	2.14	1.95	4.09	26	16	15.75	0	0
D9	0.13	0.12	0.18	0.43	0.25	0.33	0.32	0.9	0.24	0.21	0.19	0.17	0.81	0.12	0.16	0.21	0.49	0.15	0.09	0.15	0.39	0.21	0.24	0.24	0.26	0.95	0.25	0.28	0.39	0.92	0.4	0.42	0.47	1.29	0.45	0.45	0.43	0.43	1.76	2.14	1.83	3.97	18	16	15.57	0	0
D10	0.14	0.15	0.16	0.45	0.24	0.31	0.34	0.89	0.25	0.23	0.2	0.18	0.86	0.13	0.14	0.17	0.44	0.13	0.12	0.15	0.4	0.22	0.27	0.26	0.31	1.06	0.27	0.29	0.33	0.89	0.37	0.43	0.49	1.29	0.47	0.5	0.46	0.49	1.92	2.2	1.9	4.1	24	16	15.64	0	0
tooth no	İ1	i2	i3	i 1+2+3	i4	i5	i6	i 4+5+6	i7	i8	i9	i10	i 7+8+9+10	d1	d2	d3	d 1+2+3	d4	d5	d6	orta (d 4+5+6)	d7	d8	d9	d10	koronal (d 7+8+9+10)	i1+d1	i2+d2	i3+d3	apikal(iç 1+2+3)	i4+d4	i5+d5	i6+d6	orta(id 4+5+6)	i7+d7	i8+d8	i9+d9	i10+d10	koronal(7+8+9+10)	iç toplam	dış toplam	iç+dış toplam	süre	çalışma boyu	kanal boyu	kırık alet	basamak
C1	0.06	0.07	0.11	0.24	0.19	0.27	0.26	0.72	0.25	0.28	0.37	0.35	1.25	0.18	0.24	0.21	0.63	0.13	0.1	0.13	0.36	0.23	0.32	0.33	0.34	1.22	0.24	0.31	0.32	0.87	0.32	0.37	0.39	1.08	0.48	0.6	0.7	0.69	2.47	2.21	2.21	4.42	70	16	15.38	0	0
C2	0.1	0.13	0.16	0.39	0.22	0.28	0.22	0.72	0.23	0.3	0.37	0.36	1.26	0.1	0.19	0.17	0.46	0.15	0.12	0.19	0.46	0.34	0.4	0.45	0.45	1.64	0.2	0.32	0.33	0.85	0.37	0.4	0.41	1.18	0.57	0.7	0.82	0.81	2.9	2.37	2.46	4.83	83	16	15.25	0	0
C3	0.11	0.14	0.11	0.36	0.16	0.24	0.26	0.66	0.18	0.16	0.21	0.31	0.86	0.07	0.18	0.16	0.42	0.15	0.13	0.15	0.43	0.27	0.34	0.42	0.46	1.49	0.18	0.32	0.27	0.77	0.31	0.37	0.41	1.09	0.45	0.5	0.63	0.77	2.35	1.88	2.44	4.32	110	16	15.89	0	0
C4	0.05	0.07	0.06	0.18	0.09	0.21	0.29	0.59	0.25	0.21	0.22	0.26	0.94	0.14	0.18	0.26	0.58	0.33	0.16	0.17	0.66	0.24	0.3	0.32	0.35	1.21	0.19	0.25	0.32	0.76	0.42	0.37	0.46	1.25	0.49	0.51	0.54	0.61	2.15	1.71	2.45	4.26	116	15.5	15.99	0	1
C5	0.1	0.13	0.15	0.38	0.19	0.25	0.24	0.68	0.19	0.19	0.23	0.29	0.9	0.12	0.15	0.18	0.45	0.18	0.19	0.23	0.6	0.31	0.35	0.38	0.37	1.41	0.22	0.28	0.33	0.83	0.37	0.44	0.47	1.28	0.5	0.54	0.61	0.66	2.31	1.96	2.46	4.42	113	16	15.57	0	0
C6	0.05	0.09	0.09	0.23	0.13	0.23	0.29	0.65	0.21	0.14	0.11	0.13	0.59	0.28	0.28	0.27	0.83	0.2	0.14	0.18	0.52	0.24	0.31	0.35	0.41	1.31	0.33	0.37	0.36	1.06	0.33	0.37	0.47	1.17	0.45	0.45	0.46	0.54	1.9	1.47	2.66	4.13	117	15.5	15.69	0	1
C7	0.11	0.11	0.11	0.33	0.14	0.29	0.34	0.77	0.25	0.18	0.14	0.23	0.8	0.15	0.24	0.26	0.65	0.21	0.15	0.16	0.52	0.22	0.31	0.38	0.43	1.34	0.26	0.35	0.37	0.98	0.35	0.44	0.5	1.29	0.47	0.49	0.52	0.66	2.14	1.9	2.51	4.41	119	16	15.87	0	0
C8	0.07	0.08	0.08	0.23	0.16	0.27	0.28	0.71	0.21	0.19	0.2	0.22	0.82	0.13	0.24	0.26	0.63	0.19	0.12	0.17	0.48	0.26	0.31	0.36	0.38	1.31	0.2	0.32	0.34	0.86	0.35	0.39	0.45	1.19	0.47	0.5	0.56	0.6	2.13	1.76	2.42	4.18	137	16	15.42	0	0
C9	0.07	0.1	0.09	0.26	0.19	0.29	0.31	0.79	0.22	0.28	0.36	0.27	1.13	0.14	0.19	0.22	0.55	0.21	0.14	0.17	0.52	0.26	0.29	0.44	0.4	1.39	0.21	0.29	0.31	0.81	0.4	0.43	0.48	1.31	0.48	0.57	0.8	0.67	2.52	2.18	2.46	4.64	103	16	15.66	0	0
C10	0.11	0.09	0.1	0.3	0.19	0.23	0.27	0.69	0.25	0.19	0.31	0.4	1.15	0.19	0.2	0.2	0.59	0.18	0.13	0.21	0.52	0.35	0.36	0.38	0.34	1.43	0.3	0.29	0.3	0.89	0.37	0.36	0.48	1.21	0.6	0.55	0.69	0.74	2.58	2.14	2.54	4.68	95	16	15.72	0	0
D11	0.08	0.1	0.13	0.31	0.17	0.24	0.25	0.66	0.26	0.2	0.21	0.24	0.91	0.23	0.22	0.19	0.64	0.17	0.18	0.16	0.51	0.32	0.34	0.31	0.39	1.36	0.31	0.32	0.32	0.95	0.34	0.42	0.41	1.17	0.58	0.54	0.52	0.63	2.27	1.88	2.51	4.39	97	16	15.73	0	0
D12	0.07	0.1	0.12	0.29	0.21	0.25	0.27	0.73	0.27	0.19	0.16	0.32	0.94	0.25	0.16	0.23	0.64	0.16	0.18	0.19	0.53	0.27	0.32	0.36	0.39	1.34	0.32	0.26	0.35	0.93	0.37	0.43	0.46	1.26	0.54	0.51	0.52	0.71	2.28	1.96	2.51	4.47	102	16	15.69	0	0
D13	0.09	0.11	0.14	0.34	0.26	0.27	0.31	0.84	0.19	0.23	0.31	0.36	1.09	0.24	0.19	0.23	0.66	0.21	0.14	0.16	0.51	0.24	0.32	0.37	0.36	1.29	0.33	0.3	0.37	1	0.47	0.41	0.47	1.35	0.43	0.55	0.68	0.72	2.38	2.27	2.46	4.73	110	16	15.71	0	0
D14	0.1	0.14	0.13	0.37	0.18	0.26	0.24	0.68	0.21	0.19	0.24	0.32	0.96	0.15	0.17	0.23	0.55	0.31	0.18	0.15	0.64	0.31	0.34	0.36	0.4	1.41	0.25	0.31	0.36	0.92	0.49	0.44	0.39	1.32	0.52	0.53	0.6	0.72	2.37	2.01	2.6	4.61	107	16	15.63	0	0
D15	0.09	0.11	0.14	0.34	0.17	0.25	0.27	0.69	0.26	0.17	0.25	0.32	1	0.16	0.23	0.19	0.58	0.24	0.15	0.18	0.57	0.25	0.33	0.36	0.38	1.32	0.25	0.34	0.33	0.92	0.41	0.4	0.45	1.26	0.51	0.5	0.61	0.7	2.32	2.03	2.47	4.5	87	16	15.47	0	0
